# Supplementary material
Source: PubMed Central journal article supplement (PMC5805618)

Figure S1

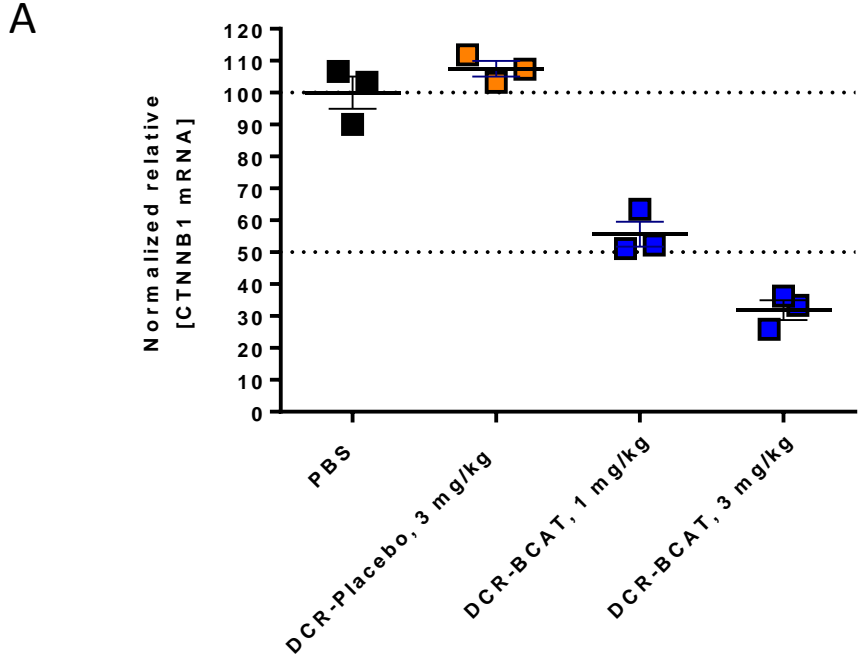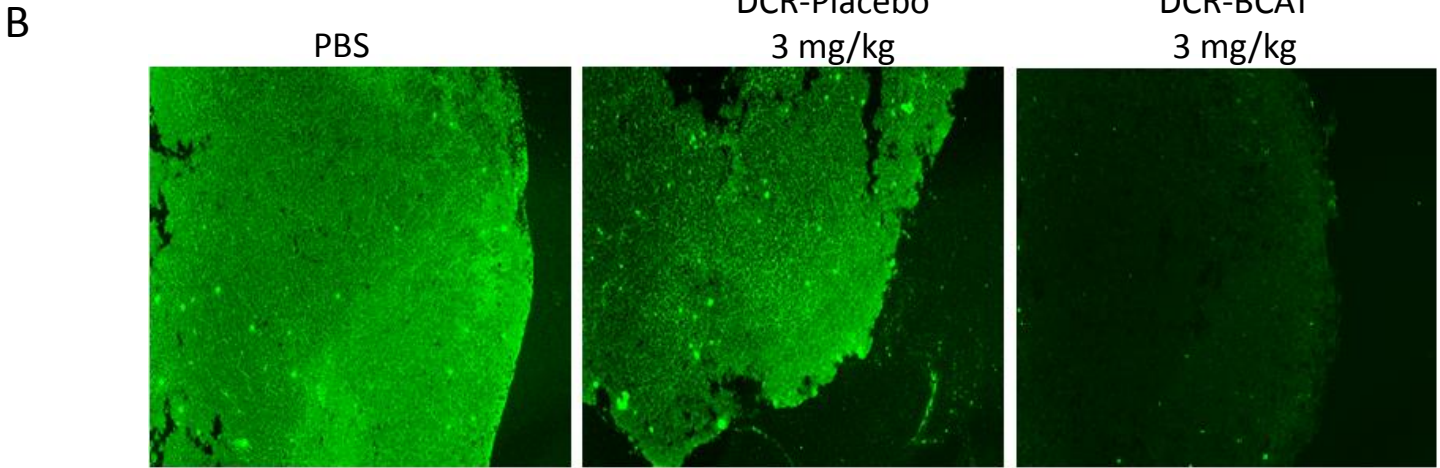

Figure S2

A

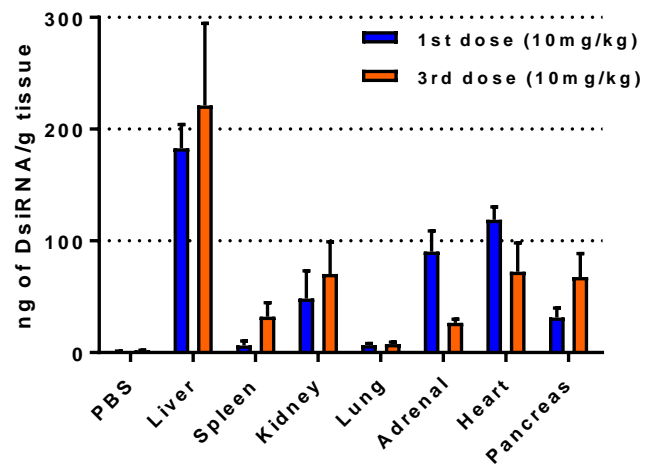

B

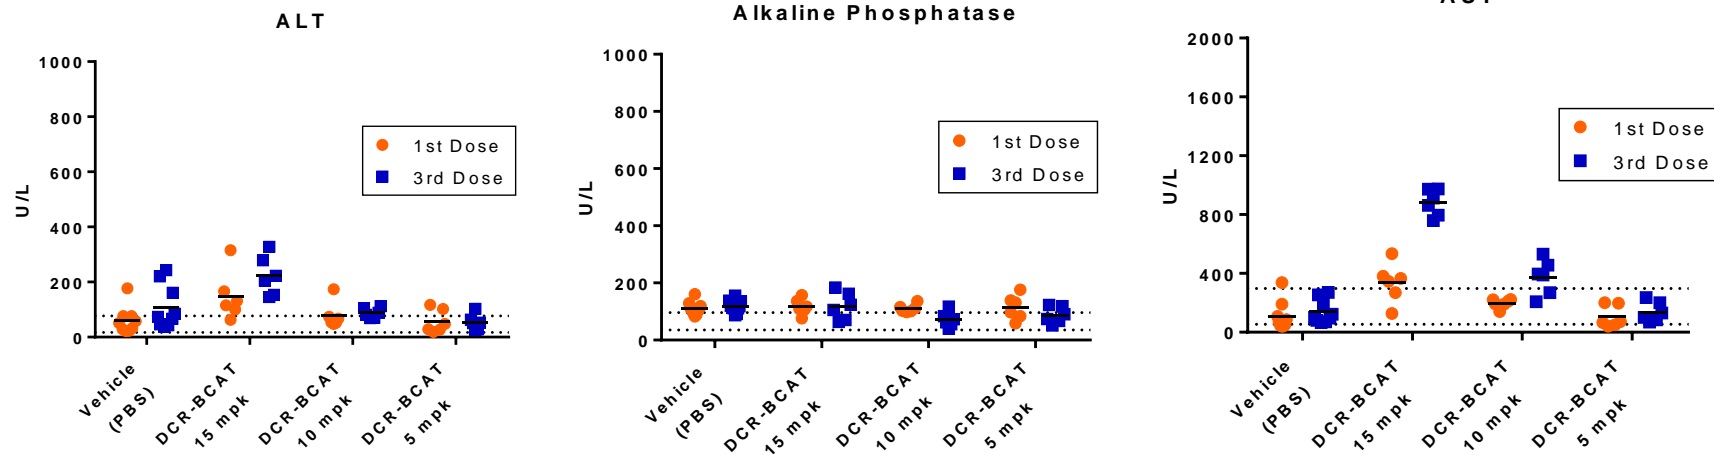

C

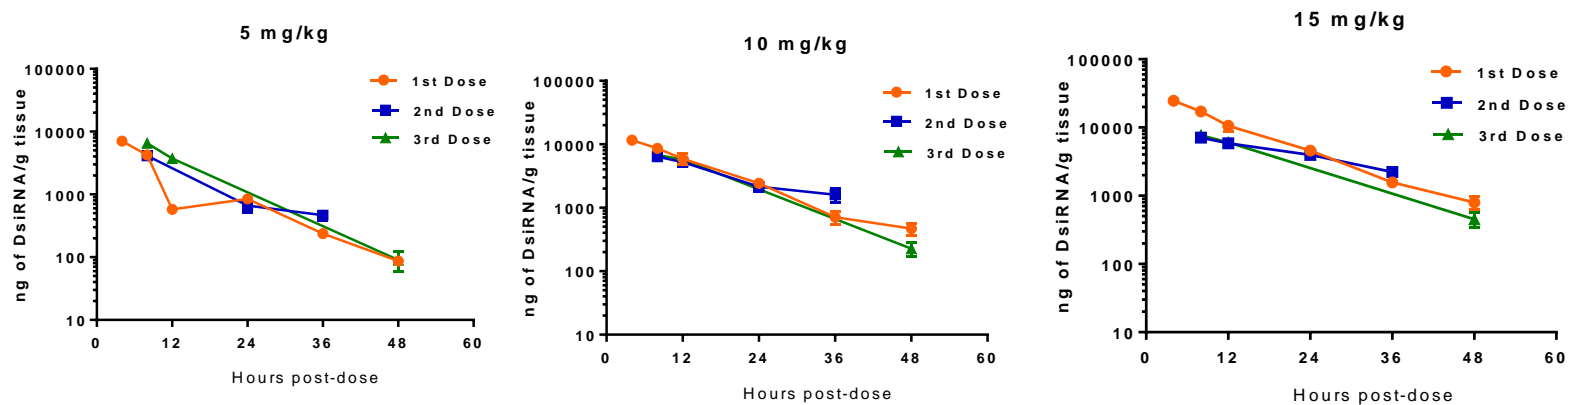

Figure S3

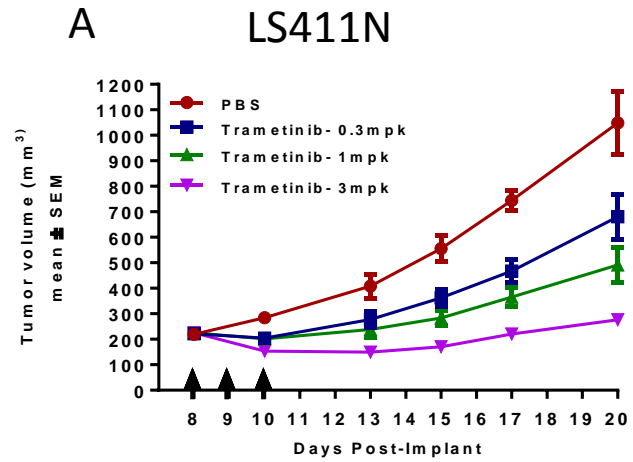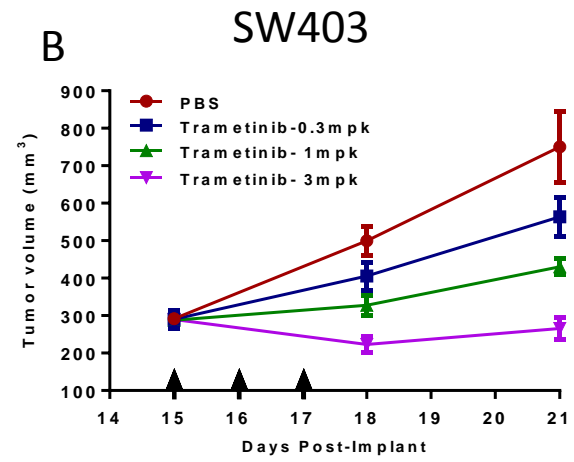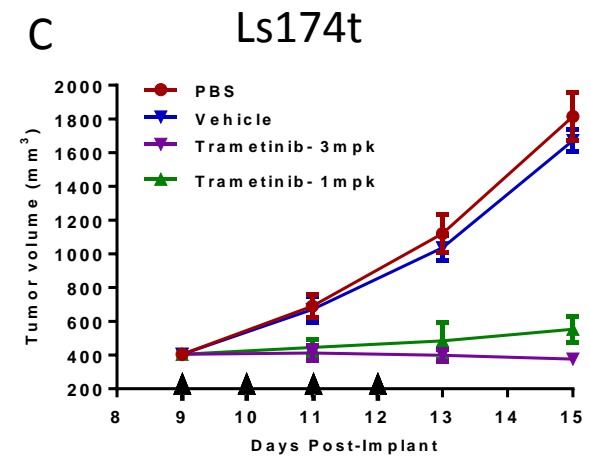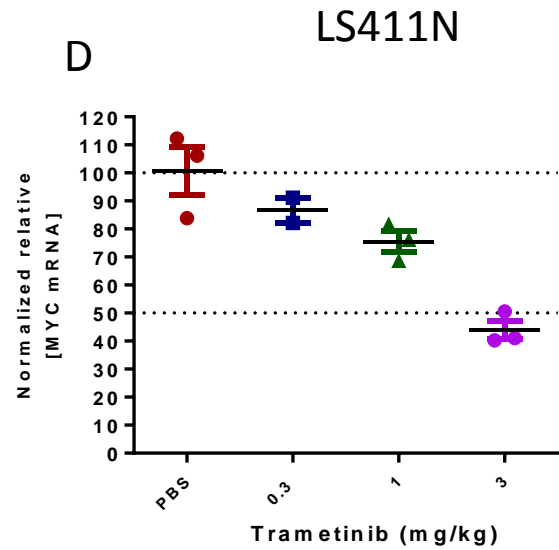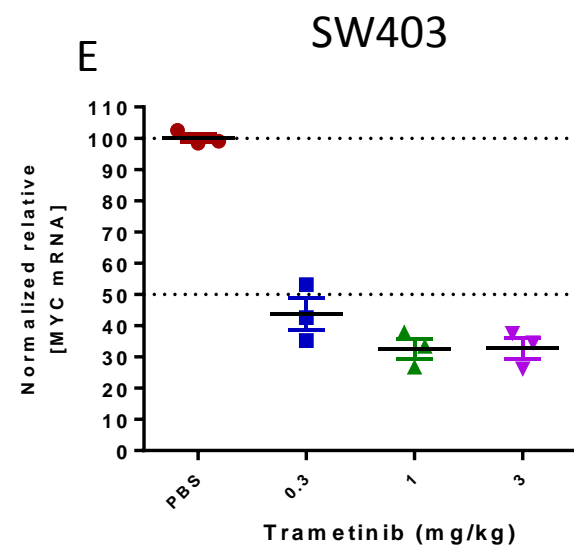

Supplement: NIHMS928429-supplement-1.pdf [file NIHMS928429-supplement-1.pdf]
